# Supplementary material
Source: PubMed Central journal article supplement (PMC3547233)

Appendix 1. Unadjusted Odds Ratio (circle) and 95% Confidence Interval (C.I.: horizontal line) of Intrinsic Variables with Fall Injury

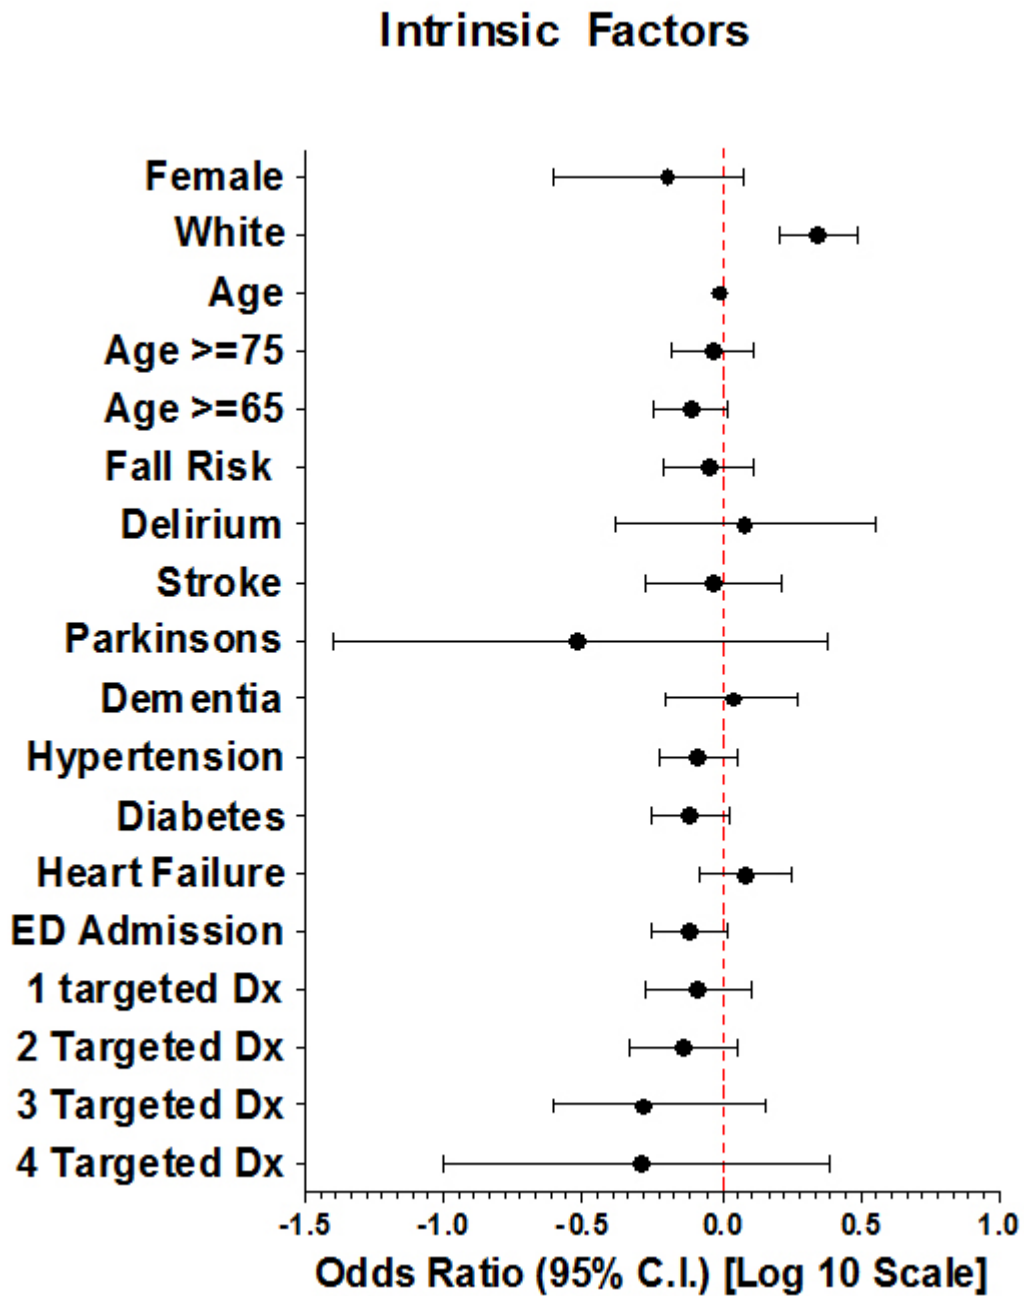

\* ED, emergency department; Dx, diagnosis.

Appendix 2. Unadjusted Odds Ratio (circle) and 95% Confidence Interval (C.I.: horizontal line) of Each Medication Class Variable, Selected Abnormal Serum Laboratory Values, Heart Rate, and Blood Pressure with Fall Injury\*

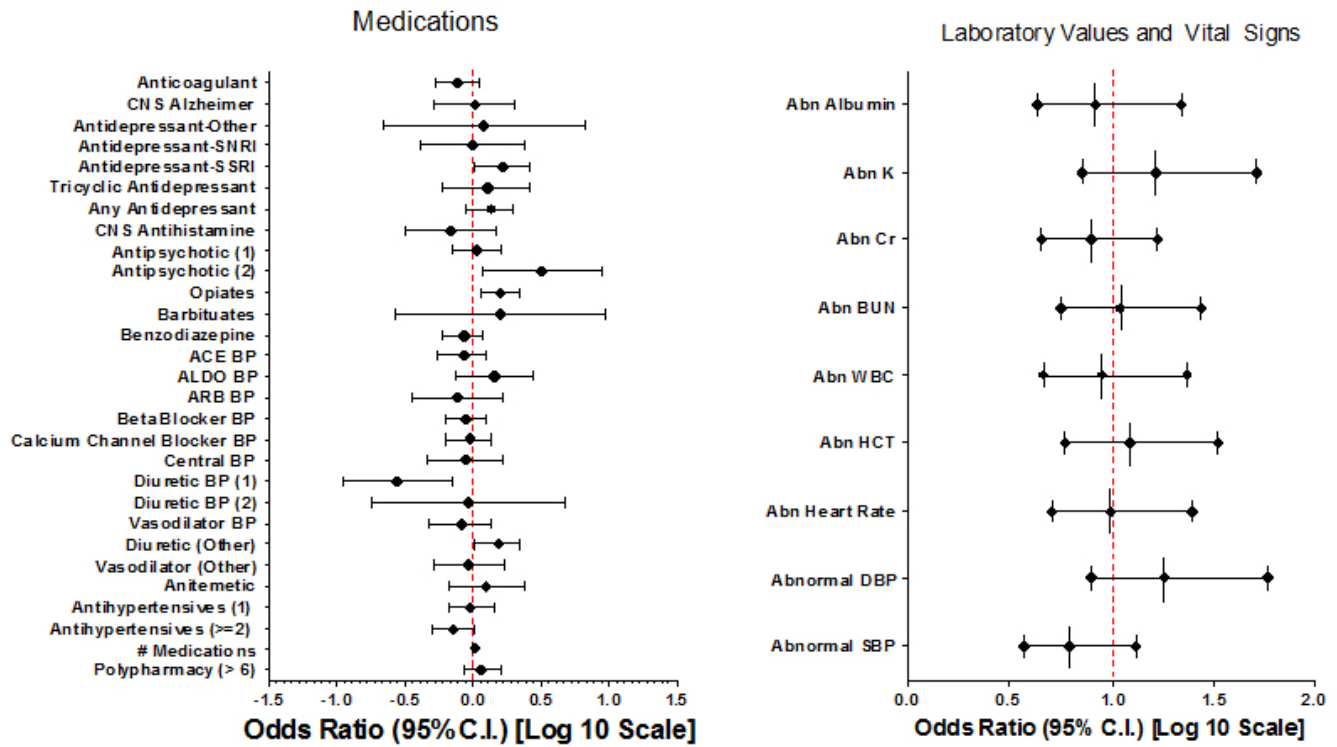

\* CNS, central nervous system; SNRI, serotonin norepinephrine reuptake inhibitor; SSRI, selective serotonin reuptake inhibitor; ACE, angiotensin-converting enzyme; BP, blood pressure; ALDO, Aldoctone (spironolactone); ARB, angiotensin receptor blocker; K, potassium; Abn, abnormal; Cr, creatinine; BUN, blood urea nitrogen; WBC, white blood cell; HCT, hematocrit; DBP, diastolic blood pressure; SBP, systolic blood pressure.

Appendix 3. Unadjusted Odds Ratio (circle) and 95% Confidence Interval (C.I.: horizontal line) of Each Activity and Extrinsic Variable with Fall Injury\*

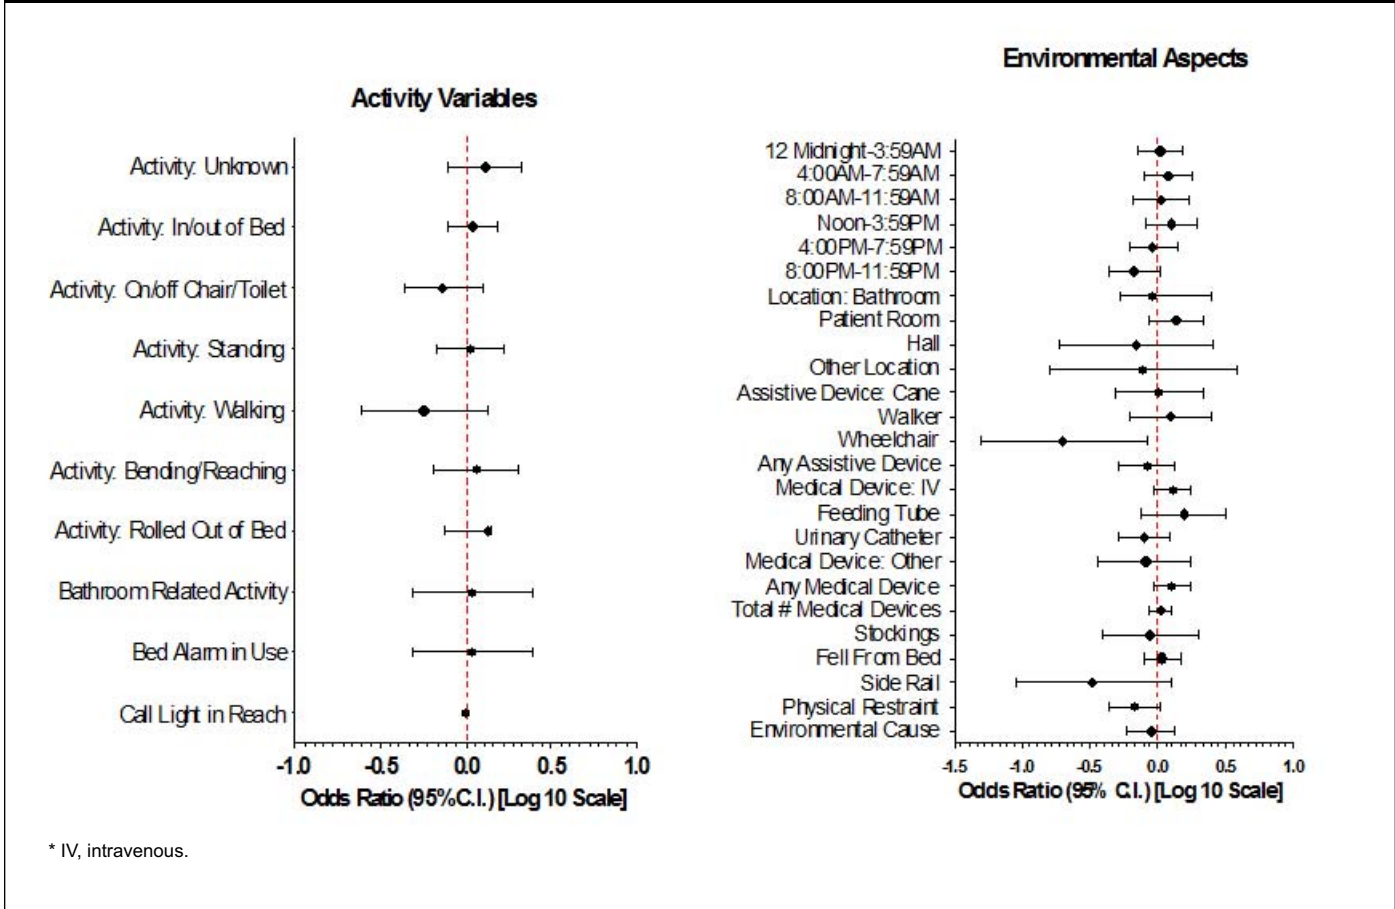

Supplement: NIHMS432790-supplement-supplement_1.pdf [file NIHMS432790-supplement-supplement_1.pdf]
